# Supplementary material
Source: publisher site journal article supplement (https://www.spandidos-publications.com/8234/downloadSupplementary)
Supplement: Supplementary file 1 [file downloadSupplementary]

Table SI. shRNA sequences.

| Name                       | Target sequence         | RNA oligo sequences<br>guide (5'→3') | RNA oligo sequences<br>passenger (5'→3') |
|----------------------------|-------------------------|--------------------------------------|------------------------------------------|
| USP4                       | ctgcaaagtcgaggtgtatttc  | AAAUACACCUCGACUUUGCAG                | GCAAAGUCGAGGUGUAUUUGC                    |
| USP4 scrambled shRNA       | cagtgtatcgtgcattagcaat  | AUUGCUGAAUGCACGAUACACUG              | GUGCUGAAUGCACGAUACACUGA                  |
| AL445238.2                 | cagaatcatctgtctcattaaca | UUAAUGAGACAGAUGAUUCUG                | GAAUCAUCUGUCUCAUUAACA                    |
| AL445238.2 scrambled shRNA | caatcacatgactattcagaact | AGUUCUGAAUAGUCAUGUUGC                | AAUCUGAAUAGUCAUGUUGA                     |

sh, short hairpin; USP4, ubiquitin specific peptidase 4.

Table SII. Primer sequences.

| Gene       | Forward primer (5'→3')      | Reverse primer (5'→3')  |
|------------|-----------------------------|-------------------------|
| AL445238.2 | ACCGATAGCATCTTTTATTAATGTGAG | AAGGTGGTGGGTTTGAAGGA    |
| USP4       | GGACCCTTAATGAGGACCACA       | TTCCACTGCTTGAACCACCG    |
| GAPDH      | GGAGCGAGATCCCTCCAAAAT       | GGCTGTTGTCATACTTCTCATGG |

USP4, ubiquitin specific peptidase 4.

Table SIII. Antibody information.

| Cat. no. | Product name                                          | Supplier                                   |
|----------|-------------------------------------------------------|--------------------------------------------|
| ab181105 | Anti-USP4                                             | Abcam                                      |
| ab32124  | Anti-Bcl-2                                            | Abcam                                      |
| ab32503  | Anti-Bax                                              | Abcam                                      |
| ab32351  | Anti-Caspase-3                                        | Abcam                                      |
| 6964T    | Bmi1 (D20B7)                                          | CST Biological Reagents Co., Ltd.          |
| 12035T   | ALDH1A1 (D4R9V)                                       | CST Biological Reagents Co., Ltd.          |
| 2929T    | EpCAM (VU1D9)                                         | CST Biological Reagents Co., Ltd.          |
| 4970T    | $\beta$ -Actin (13E5)                                 | CST Biological Reagents Co., Ltd.          |
| 5174S    | GAPDH (D16H11) XP <sup>®</sup> Rabbit mAb             | CST Biological Reagents Co., Ltd.          |
| 31800    | Goat anti-mouse IgG (H+L) Secondary Antibody, Biotin  | Invitrogen; Thermo Fisher Scientific, Inc. |
| 65-6140  | Goat anti-rabbit IgG (H+L) Secondary Antibody, Biotin | Invitrogen; Thermo Fisher Scientific, Inc. |
| 7074S    | Anti-rabbit IgG, HRP-linked Antibody                  | CST Biological Reagents Co., Ltd.          |
| 7076S    | Anti-mouse IgG, HRP-linked Antibody                   | CST Biological Reagents Co., Ltd.          |

USP4, ubiquitin specific peptidase 4; Bmi1, B lymphoma Mo-MLV insertion region 1; EpCAM, epithelial cell adhesion molecule.
